# Supplementary material for: Neuropeltis acuminata (P. Beauv.): Investigation of the Chemical Variability and In Vitro Anti-inflammatory Activity of the Leaf Essential Oil from the Ivorian Species
Source: MDPI journal article supplement (doi:10.3390/molecules27123759), 2022-06-10
Supplement: s1 [file s1]

# ***Neuropeltis acuminata* (P. Beauv.): Investigation of the Chemical Variability and In Vitro Anti-inflammatory Activity of the Leaf Essential Oil from the Ivorian Species**

**Didjour Albert Kambiré <sup>1,2</sup>, Ahmont Claude Landry Kablan <sup>1</sup>, Thierry Acafou Yapi <sup>3</sup>, Sophie Vincenti <sup>2</sup>, Jacques Maury <sup>2</sup>, Nicolas Baldovini <sup>4</sup>, Pierre Tomi <sup>2</sup>, Mathieu Paoli <sup>2</sup>, Jean Brice Boti <sup>3</sup> and Félix Tomi <sup>2,\*</sup>**

<sup>1</sup> UPR de Chimie Organique, Département de Mathématiques, Physique et Chimie, UFR des Sciences Biologiques, Université Péléforo Gon Coulibaly, Korhogo BP 1328, Ivory Coast; dakambire@gmail.com (D.A.K.); kabanahmont@yahoo.fr (A.C.L.K.)

<sup>2</sup> Laboratoire Sciences Pour l'Environnement, Université de Corse—CNRS, UMR 6134 SPE, Route des Sanguinaires, 20000 Ajaccio, France; vincenti\_s@univ-corse.fr (S.V.); maury\_j@univ-corse.fr (J.M.); tomi\_p@univ-corse.fr (P.T.); paoli\_m@univ-corse.fr (M.P.)

<sup>3</sup> Laboratoire de Constitution et Réaction de la Matière, UFR-SSMT, Université Félix Houphouët-Boigny, Abidjan BP V34, Ivory Coast; acafouth@yahoo.fr (T.A.Y.); jeanbriceboti@hotmail.fr (J.B.B.)

<sup>4</sup> Institut de Chimie de Nice, CNRS UMR 7272, Université Côte d'Azur, Parc Valrose, CEDEX 2, 06108 Nice, France; nicolas.baldovini@unice.fr

\* Correspondence: tomi\_f@univ-corse.fr

**Figure S1:**  $^1\text{H}$  NMR spectrum of compound **96** in  $\text{CDCl}_3$  (400 MHz).

**Figure S2:**  $^{13}\text{C}$  NMR spectrum of compound **96** in  $\text{CDCl}_3$  (100 MHz).

**Figure S3:** DEPT 135 NMR spectrum of compound **96** in  $\text{CDCl}_3$  (100 MHz).

**Figure S4:** DEPT 90 NMR spectrum of compound **96** in  $\text{CDCl}_3$  (100 MHz).

**Figure S5:** HSQC spectrum of compound **96** in  $\text{CDCl}_3$ .

**Figure S6:** COSY spectrum of compound **96** in  $\text{CDCl}_3$ .

**Figure S7:** HMBC spectrum of compound **96** in  $\text{CDCl}_3$ .

**Figure S8:** NOESY spectrum of compound **96** in  $\text{CDCl}_3$ .

**Table S1:** Chemical composition of the 30 leaf essential oil samples from *Neuropeltis acuminata*.

**Table S2:** Plant material and essential oil extraction data.

**Figure S1.**  $^1\text{H}$  NMR spectrum of compound **96** in  $\text{CDCl}_3$  (400 MHz).

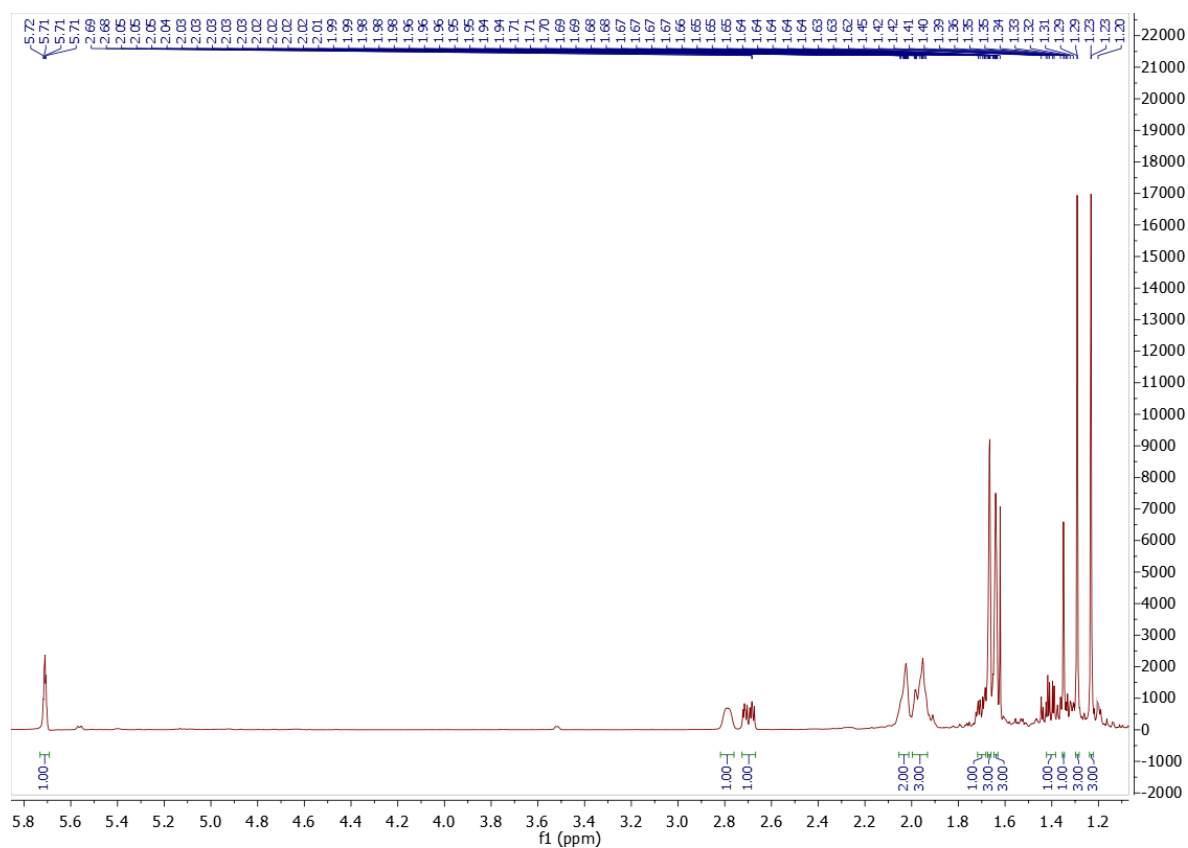

**Figure S2.**  $^{13}\text{C}$  NMR spectrum of compound **96** in  $\text{CDCl}_3$  (100 MHz).

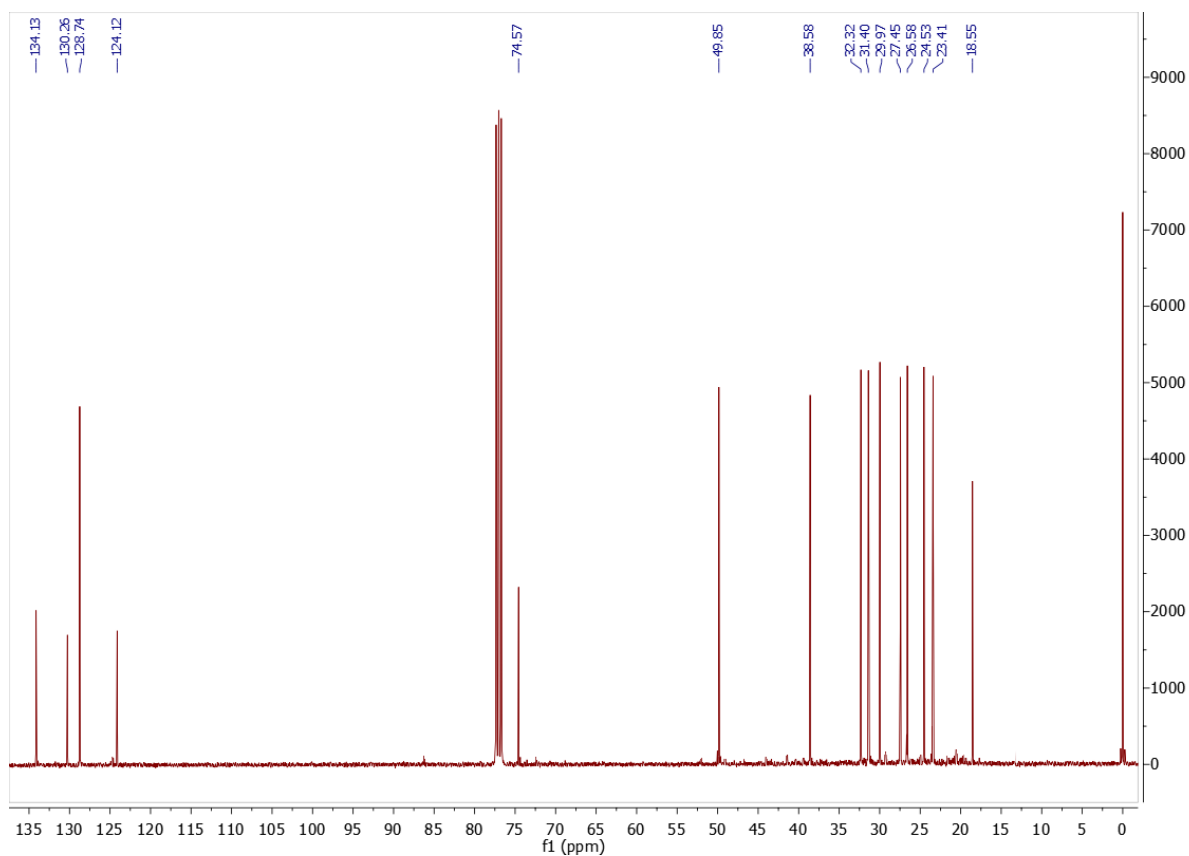

**Figure S3.** DEPT 135 NMR spectrum of compound **96** in CDCl<sub>3</sub> (100 MHz).

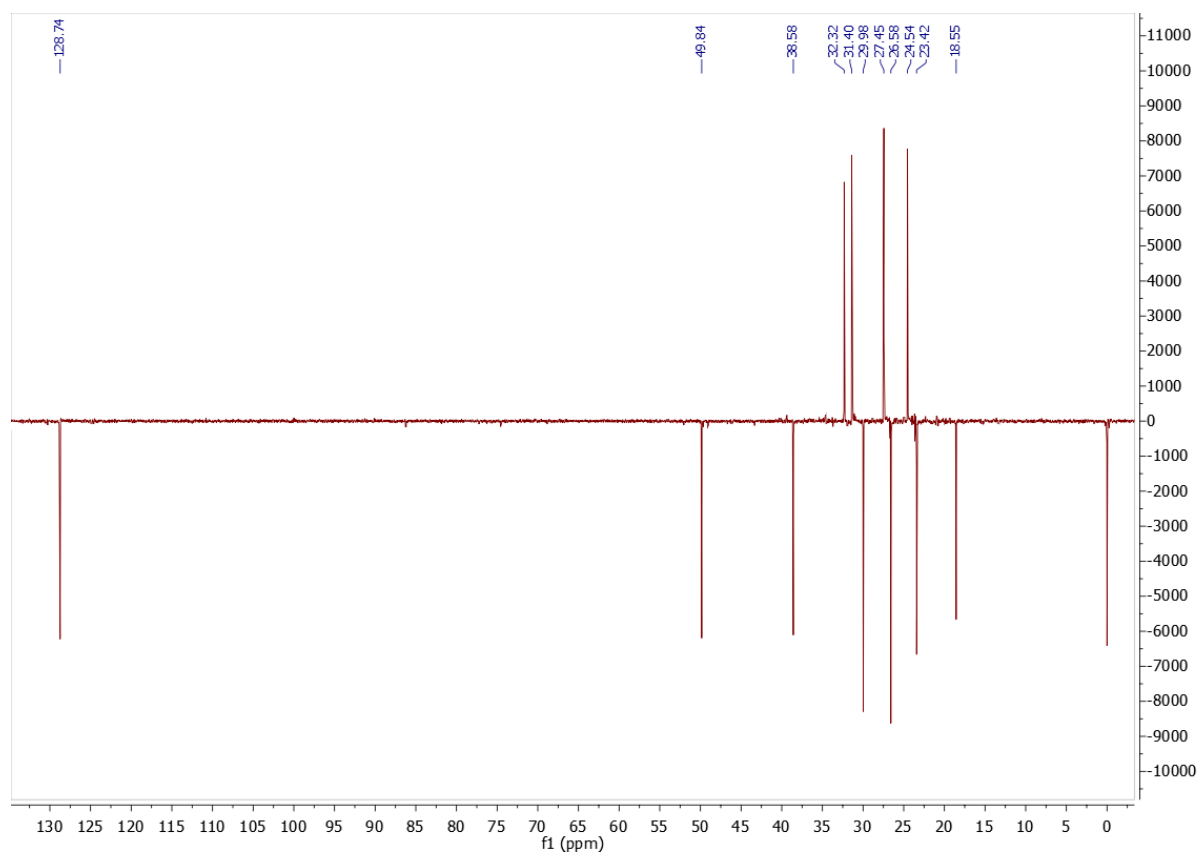

**Figure S4.** DEPT 90 NMR spectrum of compound **96** in CDCl<sub>3</sub> (100 MHz).

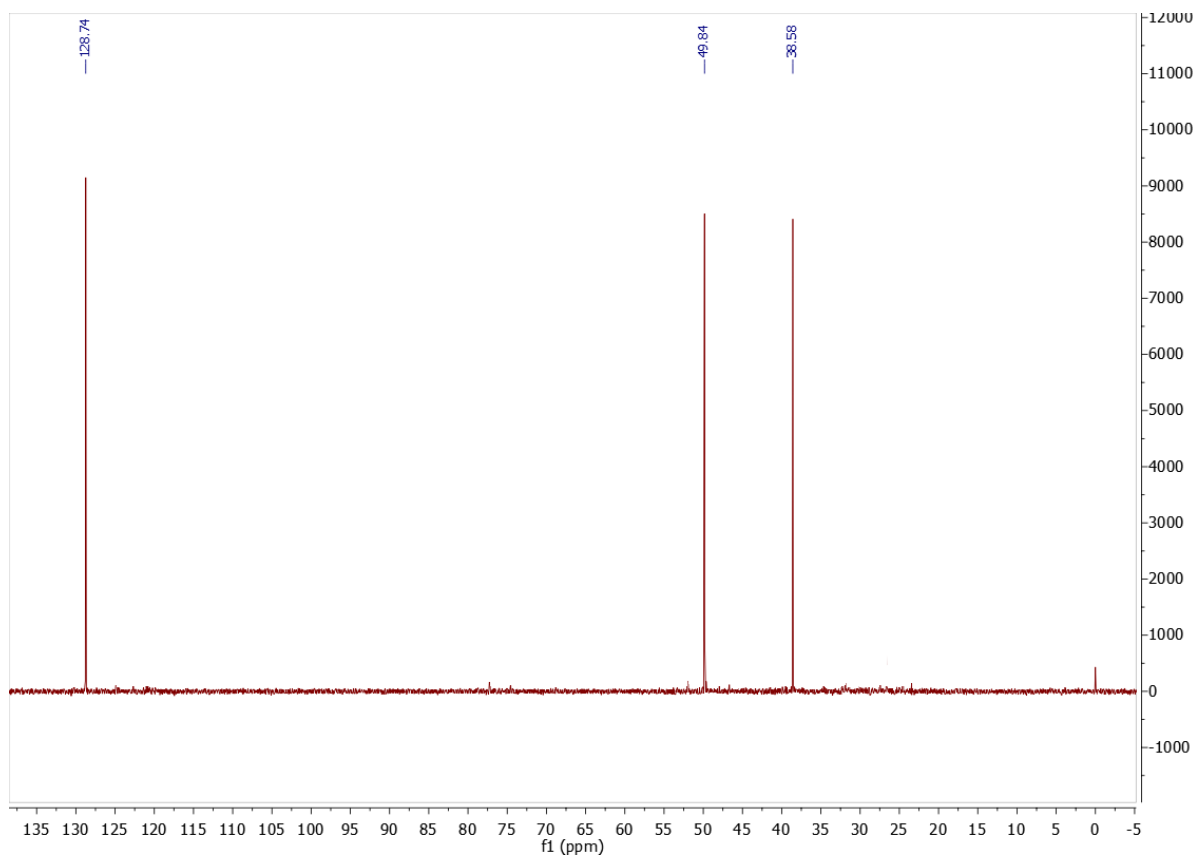

**Figure S5.** HSQC spectrum of compound **96** in CDCl<sub>3</sub>.

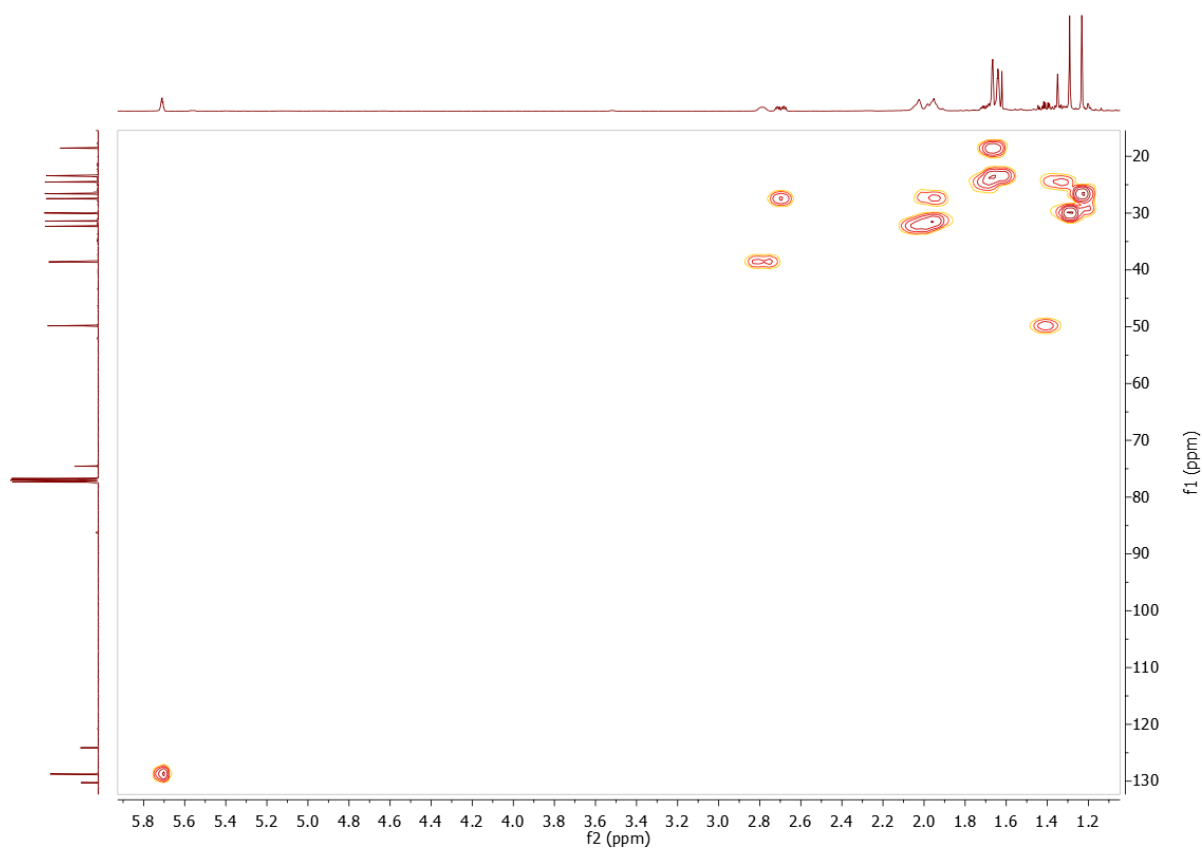

**Figure S6.** COSY spectrum of compound **96** in CDCl<sub>3</sub>.

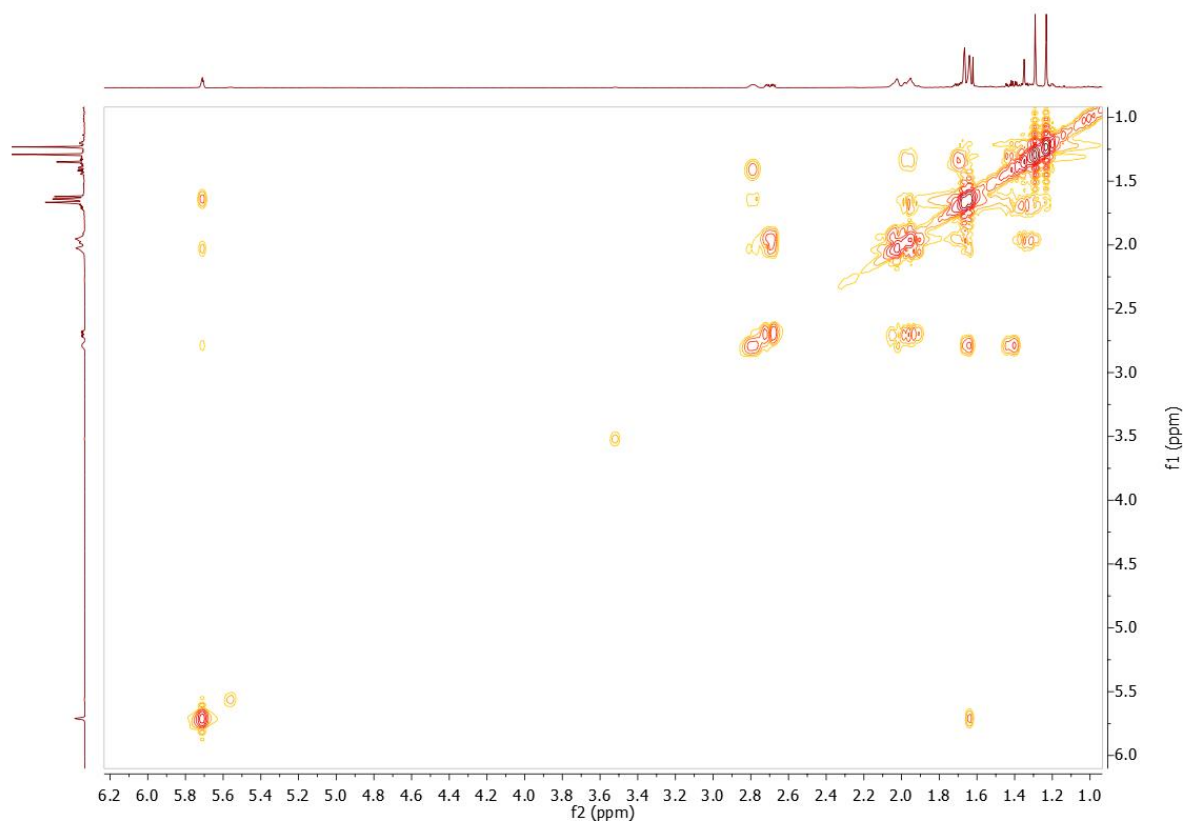

**Figure S7.** HMBC spectrum of compound **96** in CDCl<sub>3</sub>.

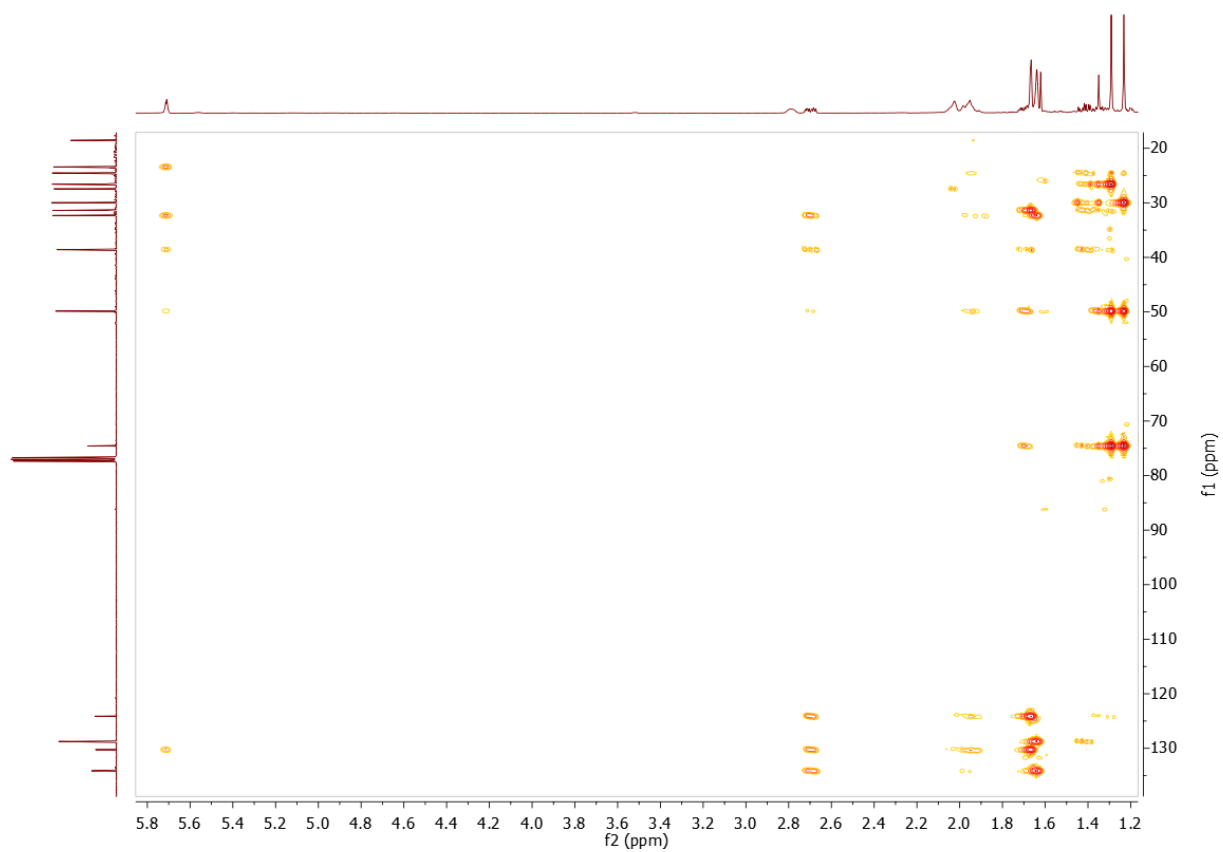

**Figure S8.** NOESY spectrum of compound **96** in CDCl<sub>3</sub>.

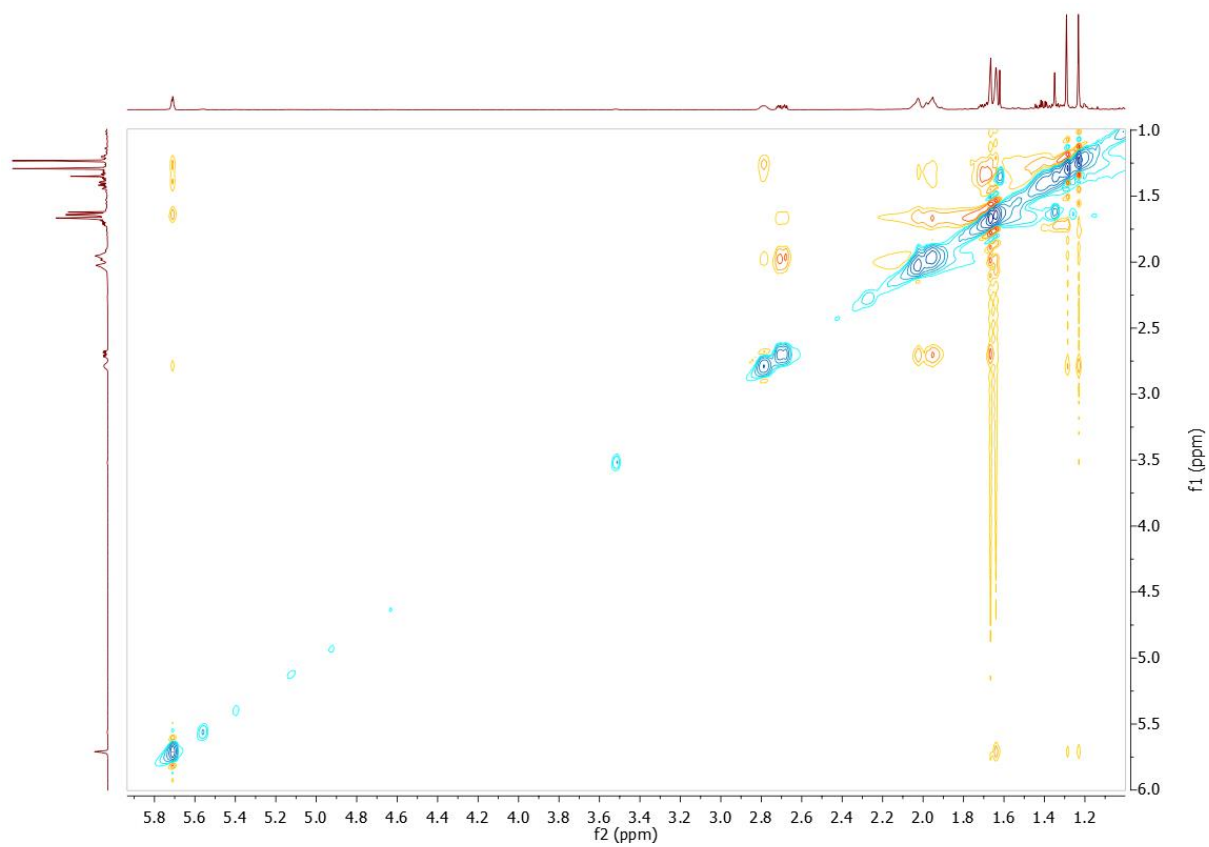

**Table S1.** Chemical composition of five leaf essential oil samples from *N. acuminata*.

| Nº | Compounds <sup>a</sup> | RI <sub>a</sub> | RI <sub>p</sub> | S1  | S2  | S3  | S30 | S4  | S5  | S6  | S7  | S8  | S10  | S11  | S12  | S13  | S14  | S15  | S17  | S19  | S9   | S16  | S18  | S20  | S21 | S22 | S23 | S24 | S25 | S26 | S27 | S28 | S29                         | Identification              |                             |
|----|------------------------|-----------------|-----------------|-----|-----|-----|-----|-----|-----|-----|-----|-----|------|------|------|------|------|------|------|------|------|------|------|------|-----|-----|-----|-----|-----|-----|-----|-----|-----------------------------|-----------------------------|-----------------------------|
| 1  | (Z)-Hex-3-en-1-ol      | 840             | 1388            | -   | tr  | 0.1 | 0.2 | -   | -   | 0.1 | 0.2 | 0.2 | tr   | tr   | tr   | 0.1  | 0.1  | 0.1  | 0.1  | tr   | -    | 0.1  | 0.1  | tr   | tr  | tr  | tr  | -   | tr  | tr  | tr  | tr  | tr                          | RI, MS                      |                             |
| 2  | Hexanol                | 854             | 1355            | 0.1 | 0.1 | 0.1 | 0.1 | tr  | -   | -   | 0.3 | 0.3 | tr   | tr   | tr   | 0.1  | 0.4  | 0.2  | 0.1  | tr   | 0.1  | 0.2  | 0.1  | 0.1  | tr  | tr  | 0.1 | tr  | tr  | tr  | tr  | -   | -                           | RI, MS                      |                             |
| 3  | α-Thujene              | 923             | 1020            | tr  | 0.1 | 0.2 | 0.2 | -   | tr  | 0.2 | -   | 0.1 | tr   | 0.1  | -    | 0.1  | 0.1  | -    | 0.1  | -    | tr   | tr   | -    | -    | tr  | -   | tr  | 0.1 | tr  | tr  | tr  | tr  | tr                          | RI, MS, <sup>13</sup> C-NMR |                             |
| 4  | α-Pinene               | 931             | 1016            | 0.1 | 0.3 | 0.1 | 1.1 | tr  | tr  | tr  | 0.1 | tr  | tr   | tr   | tr   | tr   | 0.1  | 0.1  | tr   | tr   | 0.1  | tr   | tr   | tr   | 0.1 | 0.1 | 0.1 | 0.2 | 0.6 | 0.2 | 0.4 | 0.1 | 0.3                         | RI, MS, <sup>13</sup> C-NMR |                             |
| 5  | Sabinene               | 966             | 1127            | 0.4 | 1.5 | 0.6 | tr  | 0.2 | 0.2 | 0.3 | 0.2 | 0.2 | 0.6  | 0.5  | 0.8  | 0.5  | 0.3  | 0.4  | 0.4  | 0.3  | 0.4  | 0.1  | 0.1  | 0.1  | 0.4 | 0.6 | 0.9 | 0.6 | 0.8 | 1.2 | 0.9 | 0.7 | 0.7                         | RI, MS, <sup>13</sup> C-NMR |                             |
| 6  | β-Pinene               | 971             | 1116            | 0.2 | 1.0 | 0.4 | 0.3 | tr  | tr  | tr  | 0.1 | tr  | 0.1  | tr   | tr   | tr   | 0.1  | 0.1  | tr   | tr   | 0.4  | tr   | tr   | tr   | 0.1 | 0.1 | 0.2 | 0.2 | 0.4 | 0.3 | 0.3 | 0.2 | 0.2                         | RI, MS, <sup>13</sup> C-NMR |                             |
| 7  | Myrcene                | 981             | 1166            | 0.1 | 0.3 | 0.1 | tr  | tr  | tr  | 0.1 | 0.1 | 0.1 | 0.1  | tr   | tr   | -    | 0.1  | 0.1  | tr   | tr   | 0.1  | tr   | tr   | tr   | 0.1 | 0.1 | 0.1 | tr  | 0.1 | 0.1 | 0.1 | 0.1 | 0.1                         | RI, MS                      |                             |
| 8  | α-Terpinene            | 1010            | 1186            | -   | 0.2 | 0.1 | 0.2 | tr  | -   | -   | -   | 0.1 | -    | 0.1  | -    | 0.1  | 0.1  | -    | 0.1  | -    | tr   | -    | -    | -    | 0.1 | -   | tr  | 0.1 | tr  | tr  | tr  | -   | -                           | RI, MS                      |                             |
| 9  | β-Phellandrene*        | 1022            | 1215            | tr  | 0.1 | -   | -   | -   | -   | tr  | -   | 0.1 | tr   | -    | -    | 0.1  | -    | tr   | tr   | -    | -    | tr   | -    | -    | -   | 0.1 | 0.1 | 0.1 | 0.1 | 0.1 | 0.1 | tr  | 0.1                         | RI, MS                      |                             |
| 10 | Limonene*              | 1022            | 1205            | 0.1 | 0.3 | 0.1 | 0.1 | 0.1 | tr  | 0.1 | 0.1 | tr  | 0.1  | tr   | tr   | -    | tr   | tr   | tr   | tr   | 0.1  | -    | tr   | tr   | -   | 0.1 | 0.1 | 0.1 | 0.2 | 0.2 | 0.2 | 0.2 | 0.1                         | RI, MS                      |                             |
| 11 | (Z)-β-Ocimene          | 1026            | 1237            | tr  | 0.1 | tr  | 0.1 | 0.1 | 0.1 | 0.1 | 0.1 | tr  | tr   | 0.1  | -    | 0.1  | tr   | -    | 0.1  | -    | tr   | 0.1  | -    | -    | tr  | -   | -   | 0.3 | -   | 0.1 | tr  | -   | tr                          | RI, MS, <sup>13</sup> C-NMR |                             |
| 12 | (E)-β-Ocimene          | 1037            | 1255            | 0.9 | 2.3 | 1.2 | tr  | 0.5 | 0.5 | 0.8 | 0.8 | 0.8 | 1.1  | 1.3  | 0.6  | 1.5  | 2.2  | 1.1  | 1.2  | 1.3  | 0.4  | 1.8  | 1.8  | 1.7  | 1.1 | 0.9 | 1.1 | 1.2 | 1.7 | 1.7 | 1.4 | 1.2 | 1.1                         | RI, MS, <sup>13</sup> C-NMR |                             |
| 13 | γ-Terpinene            | 1049            | 1250            | tr  | 0.3 | tr  | 0.1 | tr  | -   | 0.2 | -   | tr  | tr   | 0.1  | tr   | 0.1  | tr   | -    | tr   | tr   | tr   | -    | -    | -    | 0.1 | -   | tr  | 0.2 | tr  | tr  | tr  | tr  | tr                          | RI, MS, <sup>13</sup> C-NMR |                             |
| 14 | Terpinolene            | 1079            | 1288            | tr  | 0.2 | 0.2 | 0.1 | -   | tr  | 0.1 | -   | -   | -    | 0.1  | -    | 0.1  | 0.1  | -    | 0.1  | -    | tr   | -    | -    | -    | 0.1 | -   | tr  | 0.2 | tr  | tr  | tr  | -   | -                           | RI, MS, <sup>13</sup> C-NMR |                             |
| 15 | Linalool               | 1085            | 1550            | 0.1 | 0.2 | tr  | tr  | tr  | -   | 0.1 | tr  | tr  | 0.1  | 0.1  | tr   | tr   | 0.1  | 0.1  | tr   | tr   | tr   | tr   | tr   | 0.1  | 0.1 | 0.1 | 0.1 | tr  | 0.1 | 0.1 | 0.1 | 0.1 | 0.1                         | RI, MS                      |                             |
| 16 | Terpinen-4-ol          | 1163            | 1604            | 0.1 | 0.6 | 0.1 | tr  | tr  | -   | 0.1 | tr  | tr  | 0.1  | tr   | 0.1  | tr   | -    | tr   | tr   | 0.1  | 0.1  | -    | -    | -    | tr  | tr  | 0.1 | tr  | 0.1 | 0.1 | 0.1 | 0.1 | 0.1                         | RI, MS, <sup>13</sup> C-NMR |                             |
| 17 | Neral                  | 1217            | 1680            | 0.1 | 0.1 | 0.2 | 0.1 | 0.1 | tr  | 0.1 | -   | 0.1 | -    | 0.1  | tr   | 0.1  | 0.1  | tr   | tr   | tr   | 0.1  | -    | -    | -    | -   | -   | -   | 0.2 | -   | -   | -   | -   | -                           | RI, MS, <sup>13</sup> C-NMR |                             |
| 18 | Geraniol               | 1236            | 1837            | 0.1 | 0.2 | 0.1 | 0.1 | -   | 0.2 | tr  | -   | -   | tr   | -    | 0.2  | 0.1  | -    | 0.1  | -    | -    | 0.1  | -    | -    | tr   | -   | tr  | 0.1 | tr  | -   | -   | -   | -   | -                           | RI, MS, <sup>13</sup> C-NMR |                             |
| 19 | Geranial               | 1244            | 1732            | 0.1 | 0.2 | 0.1 | 0.1 | tr  | 0.1 | 0.1 | -   | 0.1 | -    | 0.1  | tr   | 0.1  | 0.1  | 0.1  | tr   | tr   | 0.1  | tr   | -    | -    | -   | -   | -   | 0.1 | -   | -   | -   | -   | -                           | RI, MS                      |                             |
| 20 | Thymol                 | 1268            | 2190            | 1.1 | 2.2 | 1.3 | 0.1 | tr  | tr  | tr  | tr  | tr  | 0.1  | tr   | tr   | tr   | tr   | 0.1  | 0.1  | 0.1  | tr   | tr   | 0.1  | tr   | tr  | tr  | tr  | tr  | tr  | 0.1 | tr  | 0.1 | tr                          | 0.1                         | RI, MS, <sup>13</sup> C-NMR |
| 21 | Carvacrol              | 1277            | 2228            | -   | tr  | 0.1 | 0.2 | 0.1 | 0.2 | 0.1 | 0.1 | 0.2 | 0.1  | 0.1  | 0.1  | tr   | tr   | 0.1  | 0.1  | 0.1  | 0.1  | tr   | tr   | -    | 0.1 | tr  | tr  | -   | -   | tr  | -   | tr  | -                           | RI, MS                      |                             |
| 22 | Cogeijerene            | 1282            | 1540            | tr  | tr  | 0.1 | 0.1 | -   | tr  | 0.1 | -   | tr  | -    | 0.1  | -    | 0.2  | 0.1  | -    | tr   | -    | -    | -    | -    | tr   | 0.1 | 0.1 | 0.1 | tr  | 0.1 | 0.1 | 0.1 | tr  | 0.1                         | RI, MS, <sup>13</sup> C-NMR |                             |
| 23 | Bicycloelemene         | 1332            | 1483            | tr  | -   | 0.1 | tr  | -   | 0.1 | tr  | -   | 0.1 | tr   | 0.1  | 0.1  | 0.1  | 0.2  | 0.1  | 0.1  | 0.1  | 0.1  | tr   | tr   | -    | 0.3 | 0.4 | 0.2 | 0.1 | 0.2 | 0.2 | 0.2 | 0.2 | 0.2                         | RI, MS                      |                             |
| 24 | δ-Elemene              | 1335            | 1472            | 0.4 | 0.3 | 0.4 | 0.2 | 0.3 | 0.1 | 0.2 | 0.4 | 0.3 | 0.8  | 2.0  | 0.6  | 2.2  | 3.0  | 1.4  | 1.5  | 1.8  | tr   | 0.3  | 0.9  | 0.2  | 3.1 | 2.6 | 2.6 | 2.6 | 2.7 | 2.7 | 2.8 | 2.7 | 2.5                         | RI, MS, <sup>13</sup> C-NMR |                             |
| 25 | α-Cubebene             | 1348            | 1459            | -   | tr  | 0.1 | 0.1 | tr  | tr  | 0.2 | 0.1 | tr  | 0.2  | 0.1  | 0.1  | tr   | 0.2  | 0.2  | 0.1  | 0.2  | 0.5  | -    | 0.1  | -    | tr  | tr  | tr  | 0.1 | 0.1 | tr  | 0.1 | tr  | tr                          | RI, MS, <sup>13</sup> C-NMR |                             |
| 26 | Cyclosativene          | 1369            | 1483            | 0.3 | 0.3 | 0.1 | tr  | tr  | -   | 0.1 | -   | -   | tr   | tr   | -    | 0.1  | tr   | tr   | 0.1  | 0.1  | tr   | tr   | -    | -    | 0.6 | 0.4 | 0.1 | 0.1 | 0.3 | tr  | 0.1 | tr  | 0.2                         | RI, MS, <sup>13</sup> C-NMR |                             |
| 27 | α-Ylangene             | 1371            | 1468            | tr  | -   | 0.1 | tr  | tr  | -   | 0.1 | tr  | -   | -    | tr   | -    | 0.1  | 0.2  | -    | tr   | -    | -    | -    | -    | tr   | 0.1 | 0.1 | 0.1 | -   | 0.1 | tr  | 0.1 | 0.1 | 0.1                         | RI, MS                      |                             |
| 28 | α-Copaene              | 1375            | 1493            | 0.3 | 0.4 | 0.1 | 0.7 | 0.1 | 0.1 | 0.1 | 0.2 | 0.1 | 0.2  | 0.5  | 0.1  | 0.1  | 0.3  | 0.7  | 0.1  | 0.2  | 0.1  | tr   | 0.1  | tr   | 0.3 | 0.2 | 0.1 | tr  | 0.2 | 0.1 | 0.1 | 0.1 | 0.1                         | RI, MS, <sup>13</sup> C-NMR |                             |
| 29 | β-Bourbonene           | 1383            | 1520            | tr  | tr  | 0.1 | 0.2 | tr  | tr  | 0.1 | -   | -   | 0.1  | 0.1  | 0.1  | tr   | 0.1  | 0.1  | tr   | 0.1  | -    | -    | tr   | -    | tr  | tr  | tr  | 0.1 | tr  | tr  | tr  | tr  | tr                          | RI, MS                      |                             |
| 30 | β-Cubebene*            | 1387            | 1539            | 0.2 | 0.2 | 0.2 | 0.3 | 0.2 | 0.2 | 0.3 | 0.5 | 0.3 | 0.7  | 0.3  | 0.3  | 0.4  | 0.8  | 0.9  | 0.7  | 0.7  | 0.1  | 0.1  | 0.1  | 0.1  | 1.0 | 1.0 | 1.0 | 1.0 | 1.1 | 1.0 | 1.0 | 0.9 | RI, MS, <sup>13</sup> C-NMR |                             |                             |
| 31 | β-Elemene*             | 1387            | 1591            | 4.5 | 4.1 | 4.4 | 5.2 | 1.1 | 0.5 | 0.6 | 1.0 | 0.6 | 1.8  | 1.5  | 1.1  | 1.6  | 1.9  | 3.7  | 3.0  | 3.0  | 2.8  | 2.7  | 2.1  | 4.6  | 1.7 | 1.5 | 1.2 | 1.2 | 1.4 | 1.2 | 1.5 | 1.1 | 1.5                         | RI, MS, <sup>13</sup> C-NMR |                             |
| 32 | Cyperene               | 1399            | 1528            | 0.2 | 0.4 | 0.2 | 0.3 | tr  | -   | 0.1 | tr  | tr  | tr   | tr   | -    | 0.2  | tr   | tr   | tr   | tr   | -    | -    | -    | -    | 0.1 | 0.1 | 0.1 | tr  | 0.1 | tr  | 0.1 | tr  | 0.1                         | RI, MS, <sup>13</sup> C-NMR |                             |
| 33 | α-Gurjunene            | 1409            | 1531            | 0.7 | 0.6 | 0.7 | 2.3 | 0.6 | 0.1 | tr  | 0.2 | 0.1 | 0.4  | 0.1  | 0.1  | 0.2  | 0.5  | 2.8  | 2.7  | 2.4  | 0.1  | 0.5  | 0.9  | 0.1  | tr                          | RI, MS, <sup>13</sup> C-NMR |                             |
| 34 | (E)-β-Caryophyllene    | 1417            | 1597            | 1.6 | 2.4 | 1.8 | 4.7 | 0.9 | 0.9 | 3.4 | 9.4 | 2.0 | 15.9 | 21.9 | 25.0 | 20.0 | 12.5 | 14.4 | 15.8 | 15.5 | 45.4 | 34.2 | 32.5 | 34.4 | 1.1 | 1.1 | 1.0 | 1.0 | 1.1 | 1.1 | 1.2 | 1.0 | 1.1                         | RI, MS, <sup>13</sup> C-NMR |                             |
| 35 | β-Copaene              | 1426            | 1591            | 0.9 | 0.1 | 0.5 | 0.1 | 0.3 | 0.4 | 0.1 | 0.4 | 0.3 | 0.5  | 0.6  | 0.2  | 0.7  | 1.3  | 0.5  | 0.6  | 0.5  | 0.2  | 0.1  | 0.2  | 0.1  | 2.9 | 2.5 | 3.3 | 3.1 | 3.5 | 3.4 | 3.6 | 3.4 | 3.0                         | RI, MS, <sup>13</sup> C-NMR |                             |
| 36 | γ-Elemene #            | 1427            | 1640            | 5.8 | 4.5 | 5.5 | 4.1 | 0.7 | 0.2 | 0.3 | 0.5 | 0.3 | 3.2  | 1.4  | 1.5  | 1.3  | 0.9  | 1.2  | 1.2  | 1.4  | 0.6  | 0.3  | 0.9  | 0.3  | 2.0 | 1.8 | 1.1 | 1.1 | 1.2 | 0.9 | 1.0 | 0.8 | 1.3                         | RI, MS, <sup>13</sup> C-NMR |                             |
| 37 | trans-α-Bergamotene    | 1432            | 1586            | 0.1 | 0.2 | 0.1 | 1.7 | 0.1 | 0.1 | tr  | 0.1 | 0.1 | tr   | tr   | tr   | tr   | 0.2  | 0.1  | tr   | tr   | tr   | tr   | tr   | tr   | 0.2 | 0.1 | 0.1 | 0.4 | 0.2 | 0.1 | 0.1 | 0.1 | 0.1                         | RI, MS, <sup>13</sup> C-NMR |                             |





|                            |                           |      |      |      |      |      |      |      |      |      |      |      |      |      |      |      |      |      |      |      |      |      |      |      |      |      |      |      |      |      |      |      |                             |                             |
|----------------------------|---------------------------|------|------|------|------|------|------|------|------|------|------|------|------|------|------|------|------|------|------|------|------|------|------|------|------|------|------|------|------|------|------|------|-----------------------------|-----------------------------|
| 80                         | Copaborneol*              | 1593 | 2183 | 1.2  | 0.2  | 1.4  | 0.1  | 0.1  | -    | tr   | 0.1  | tr   | -    | -    | tr   | 0.1  | 0.2  | 0.1  | 0.1  | tr   | 0.1  | tr   | tr   | -    | -    | -    | tr   | 0.2  | 0.1  | tr   | -    | tr   | -                           | RI, MS, <sup>13</sup> C-NMR |
| 81                         | Eudesm-5-en-11-ol         | 1595 | 2132 | tr   | tr   | tr   | 0.1  | 0.2  | 0.2  | 0.3  | 0.1  | 0.7  | 0.3  | 0.4  | 0.3  | 0.5  | tr   | 0.3  | 0.2  | 0.4  | 0.5  | 0.2  | tr   | 1.7  | 1.2  | 0.5  | 0.8  | 1.1  | 0.4  | 0.6  | 0.5  | 0.8  | RI, MS, <sup>13</sup> C-NMR |                             |
| 82                         | neo-Intermedeol           | 1599 | 2146 | 0.4  | 0.1  | 0.1  | -    | 0.1  | -    | tr   | tr   | -    | -    | 0.4  | 0.1  | tr   | 0.7  | 0.2  | 0.1  | -    | -    | 0.1  | -    | tr   | tr   | -    | -    | 0.2  | -    | -    | -    | -    | RI, MS, <sup>13</sup> C-NMR |                             |
| 83                         | epi-Cubenol               | 1606 | 2048 | tr   | 0.1  | tr   | tr   | 0.4  | tr   | 0.2  | tr   | 0.1  | 0.2  | 0.2  | 0.2  | 0.2  | 0.3  | 0.7  | 5.5  | 3.3  | 0.5  | 1.0  | 0.4  | 0.4  | 0.5  | 0.4  | 0.2  | 0.3  | 0.3  | tr   | 0.2  | 0.2  | 0.3                         | RI, MS, <sup>13</sup> C-NMR |
| 84                         | Alismol                   | 1610 | 2248 | 0.3  | 0.2  | tr   | tr   | 0.1  | tr   | -    | 0.1  | 0.2  | 0.1  | 0.2  | 0.1  | tr   | 0.6  | 0.1  | tr   | 0.2  | 0.2  | 0.2  | 0.1  | 0.5  | 0.1  | 0.2  | tr   | 0.1  | 0.3  | 0.2  | 0.2  | 0.2  | RI, MS, <sup>13</sup> C-NMR |                             |
| 85                         | Eremoligenol              | 1614 | 2196 | 0.6  | 0.6  | 0.1  | 0.2  | 0.1  | tr   | -    | 0.1  | 0.1  | 0.2  | 0.1  | tr   | -    | 0.2  | 0.2  | 0.1  | -    | tr   | 0.1  | 0.1  | tr   | 0.2  | 0.1  | tr   | 0.2  | 0.2  | 0.1  | 0.2  | 0.1  | 0.2                         | RI, MS, <sup>13</sup> C-NMR |
| 86                         | 10-epi-γ-Eudesmol         | 1617 | 2096 | 1.5  | 0.9  | 1.4  | tr   | 0.7  | 0.6  | 0.3  | 0.6  | 0.6  | 0.9  | 0.9  | 0.9  | 1.3  | 3.0  | 1.2  | 1.3  | 1.0  | 0.2  | 0.4  | 0.3  | tr   | 0.4  | 0.4  | 0.4  | 0.3  | 0.5  | 0.4  | 0.4  | 0.4  | 0.5                         | RI, MS, <sup>13</sup> C-NMR |
| 87                         | τ-Cadinol                 | 1625 | 2175 | 0.7  | 0.9  | 0.3  | 0.3  | 0.2  | 0.1  | -    | 0.2  | -    | 1.0  | 0.3  | 0.2  | 0.2  | 0.3  | 0.2  | 0.3  | 0.3  | 0.1  | 0.2  | 0.2  | tr   | 0.6  | 0.2  | 0.2  | 0.4  | 0.5  | 0.5  | 0.4  | 0.4  | 0.4                         | RI, MS, <sup>13</sup> C-NMR |
| 88                         | τ-Muurolol                | 1628 | 2184 | 0.7  | 0.9  | 0.7  | tr   | 0.6  | 0.4  | 0.2  | 0.4  | tr   | 1.7  | 0.8  | 0.3  | 0.8  | 0.9  | 2.0  | 0.6  | 0.8  | 0.1  | 0.2  | 0.5  | tr   | 0.6  | 0.7  | 0.6  | 0.7  | 0.7  | 0.7  | 0.7  | 0.7  | RI, MS, <sup>13</sup> C-NMR |                             |
| 89                         | α-Muurolol                | 1630 | 2212 | 0.2  | 0.2  | 0.2  | tr   | tr   | tr   | tr   | 0.3  | 0.4  | 1.0  | 0.7  | 0.4  | 0.6  | 0.4  | 1.0  | 0.4  | 0.5  | 0.2  | tr   | 0.1  | 0.1  | 0.2  | 0.2  | 0.2  | 0.2  | 0.3  | 0.2  | 0.2  | 0.2  | RI, MS, <sup>13</sup> C-NMR |                             |
| 90                         | β-Eudesmol                | 1634 | 2225 | 0.2  | 0.2  | 0.2  | tr   | 1.9  | 2.2  | 6.3  | 2.7  | 2.4  | 1.5  | 2.1  | 1.1  | 1.9  | 1.3  | 1.3  | 0.9  | 1.6  | 0.9  | 0.5  | 1.2  | 0.7  | 0.6  | 0.6  | 0.5  | 0.5  | 0.6  | 0.5  | 0.5  | 0.5  | 0.6                         | RI, MS, <sup>13</sup> C-NMR |
| 91                         | α-Cadinol                 | 1637 | 2228 | 1.1  | 1.5  | 1.2  | 0.4  | tr   | tr   | 0.7  | tr   | tr   | tr   | tr   | tr   | 0.5  | 2.4  | 2.5  | 1.2  | 0.5  | tr   | 0.5  | tr                          | RI, MS, <sup>13</sup> C-NMR |
| 92                         | α-Eudesmol                | 1638 | 2216 | tr   | 0.1  | tr   | tr   | tr   | tr   | 2.1  | tr   | tr   | 1.9  | 0.7  | 0.4  | 0.6  | tr   | tr   | tr   | 0.2  | tr                          | RI, MS, <sup>13</sup> C-NMR |
| 93                         | Atractylone               | 1639 | 2121 | 0.4  | 3.2  | 1.0  | tr   | 3.2  | 2.8  | 3.3  | 2.6  | 3.2  | 0.9  | 2.9  | tr   | 2.7  | 2.0  | 3.3  | 0.8  | 2.6  | 1.5  | 0.8  | 2.1  | 1.5  | 4.8  | 9.3  | 11.9 | 10.0 | 7.1  | 10.4 | 10.1 | 10.7 | 12.1                        | RI, MS, <sup>13</sup> C-NMR |
| 94                         | Intermedeol               | 1641 | 2249 | 0.1  | 0.3  | 0.1  | tr   | 1.1  | 1.2  | 0.8  | 0.8  | 1.0  | 0.6  | 0.2  | 0.1  | 0.2  | 0.3  | 0.3  | 0.8  | 0.7  | tr   | 0.2  | 0.4  | 0.2  | 0.7  | tr                          | RI, MS, <sup>13</sup> C-NMR |
| 95                         | Bulnesol*                 | 1651 | 2207 | 0.4  | 0.5  | 0.4  | 0.2  | 7.5  | 7.6  | 5.2  | 5.9  | 6.1  | 3.7  | 1.4  | 1.6  | 1.5  | 1.9  | 1.7  | 4.2  | 3.9  | 1.6  | 1.0  | 3.0  | 1.0  | 3.2  | 5.1  | 6.6  | 6.2  | 5.4  | 7.0  | 6.2  | 7.2  | 6.4                         | RI, MS, <sup>13</sup> C-NMR |
| 96                         | δ-Cadinen-11-ol*          | 1651 | 2271 | 0.7  | 1.4  | 0.8  | 0.1  | 0.2  | tr   | 2.9  | 3.4  | 2.1  | tr   | 0.2  | tr   | 0.2  | 0.4  | 0.4  | 0.1  | 0.2  | 0.1  | tr   | tr   | 0.1  | 3.1  | 2.7  | 1.8  | 1.8  | 2.1  | 1.4  | 1.5  | 1.4  | 2.1                         | RI, MS, <sup>13</sup> C-NMR |
| 97                         | α-Bisabolol               | 1666 | 2208 | 0.3  | 0.2  | 0.3  | 0.2  | tr   | 0.1  | tr   | 0.2  | 0.8  | tr   | 0.6  | 1.6  | 0.5  | 0.1  | tr   | tr   | tr   | tr   | tr   | tr   | 0.1  | 0.2  | 0.1  | 0.1  | 0.6  | 0.2  | 0.1  | 0.1  | 0.2  | 0.1                         | RI, MS, <sup>13</sup> C-NMR |
| 98                         | epi-α-Bisabolol           | 1668 | 2214 | 0.3  | 0.2  | 0.2  | tr   | 0.1  | 0.1  | -    | 0.1  | 0.5  | 0.2  | -    | tr   | 0.2  | -    | -    | 0.2  | 0.3  | tr   | -    | tr   | -    | 0.6  | 0.4  | 0.5  | 0.1  | 0.5  | 0.6  | 0.3  | 0.5  | 0.5                         | RI, MS, <sup>13</sup> C-NMR |
| 99                         | Cadina-1(10),4-dien-8α-ol | 1671 | 2306 | -    | -    | -    | tr   | tr   | tr   | 0.4  | tr   | tr   | tr   | 7.1  | 0.1  | 8.1  | 12.1 | 1.2  | 0.2  | 0.1  | tr   | 1.6  | 0.5  | 0.4  | 0.6  | 0.4  | 0.2  | 0.3  | 0.2  | 0.2  | 0.1  | 0.3  | RI, MS, <sup>13</sup> C-NMR |                             |
| 100                        | Germacrone                | 1673 | 2221 | 0.7  | 1.2  | 0.8  | -    | 0.2  | 0.2  | 0.2  | 0.3  | 0.3  | 0.3  | tr   | 0.1  | tr   | 0.1  | 0.3  | 0.2  | 1.2  | 0.2  | tr   | 0.6  | 0.1  | 0.1  | 0.3  | 0.2  | 0.1  | 0.1  | 0.2  | 0.2  | 0.2  | 0.3                         | RI, MS, <sup>13</sup> C-NMR |
| 101                        | (E)-γ-Bisabolen-12-al     | 1761 | 2348 | 0.6  | 1.1  | 0.7  | tr   | 1.3  | 1.6  | 1.1  | 0.9  | 3.3  | 0.4  | tr   | 0.2  | tr   | 0.1  | 0.1  | tr   | 0.1  | 0.2  | tr   | 0.3  | tr   | 1.2  | 1.5  | 2.0  | 1.9  | 2.0  | 2.4  | 1.9  | 2.5  | 2.0                         | RI, MS, <sup>13</sup> C-NMR |
| 102                        | (E)-γ-Bisabolen-12-ol     | 1776 | 2549 | 6.1  | 5.9  | 6.1  | 5.2  | 3.6  | 4.6  | 2.5  | 2.7  | 8.8  | 1.0  | 1.1  | 1.6  | 1.0  | 0.8  | 1.3  | 0.4  | 0.5  | 1.0  | 0.3  | 1.4  | 0.3  | 9.4  | 7.4  | 6.6  | 7.1  | 8.4  | 7.5  | 5.3  | 8.1  | 5.8                         | RI, MS, <sup>13</sup> C-NMR |
| 103                        | (E)-Phytol                | 2098 | 2609 | 0.1  | 0.1  | 0.4  | 5.9  | 0.2  | 0.1  | 0.3  | 0.2  | 0.2  | 0.2  | 0.2  | 0.2  | 0.1  | 0.2  | 0.3  | 0.2  | 0.2  | 0.3  | 0.2  | 0.3  | 0.1  | 0.6  | 0.2  | 0.3  | 0.1  | 0.6  | 0.3  | 0.4  | 0.4  | 0.5                         | RI, MS, <sup>13</sup> C-NMR |
| Monoterpene hydrocarbons   |                           |      |      | 1.8  | 6.7  | 3.0  | 2.2  | 0.9  | 0.8  | 1.9  | 1.5  | 1.4  | 2.0  | 2.3  | 1.4  | 2.6  | 3.1  | 1.8  | 2.0  | 1.6  | 1.5  | 2.0  | 1.9  | 1.8  | 2.1  | 2.0  | 2.6  | 3.3  | 3.9  | 3.9  | 3.4  | 2.5  | 2.6                         |                             |
| Oxygenated monoterpenes    |                           |      |      | 1.6  | 3.5  | 1.9  | 0.6  | 0.2  | 0.3  | 0.7  | 0.1  | 0.4  | 0.4  | 0.4  | 0.2  | 0.4  | 0.4  | 0.4  | 0.3  | 0.3  | 0.4  | 0.1  | 0.1  | 0.1  | 0.2  | 0.1  | 0.2  | 0.4  | 0.3  | 0.2  | 0.3  | 0.2  | 0.3                         |                             |
| Sesquiterpene hydrocarbons |                           |      |      | 58.3 | 47.6 | 55.4 | 72.9 | 27.0 | 25.3 | 26.2 | 38.2 | 24.3 | 59.5 | 67.0 | 80.1 | 62.2 | 50.3 | 57.1 | 53.8 | 55.1 | 77.3 | 80.0 | 65.1 | 81.7 | 53.1 | 46.6 | 43.5 | 43.8 | 46.9 | 42.8 | 45.6 | 42.7 | 42.6                        |                             |
| Oxygenated sesquiterpenes  |                           |      |      | 35.5 | 39.5 | 34.8 | 17.3 | 71.1 | 72.8 | 68.7 | 58.8 | 71.7 | 37.5 | 29.5 | 17.7 | 31.3 | 44.1 | 39.5 | 43.0 | 42.0 | 19.5 | 16.9 | 31.9 | 15.8 | 43.0 | 50.1 | 52.5 | 50.7 | 46.9 | 51.9 | 49.0 | 52.9 | 53.4                        |                             |
| Other compounds            |                           |      |      | 0.2  | 0.2  | 0.6  | 6.2  | 0.2  | 0.1  | 0.4  | 0.7  | 0.7  | 0.2  | 0.2  | 0.2  | 0.3  | 0.7  | 0.6  | 0.4  | 0.2  | 0.4  | 0.5  | 0.5  | 0.2  | 0.6  | 0.2  | 0.4  | 0.1  | 0.6  | 0.3  | 0.4  | 0.4  | 0.5                         |                             |
| Total                      |                           |      |      | 97.4 | 97.5 | 95.7 | 99.2 | 99.4 | 99.3 | 97.9 | 99.3 | 98.5 | 99.6 | 99.4 | 99.6 | 96.8 | 98.6 | 99.4 | 99.5 | 99.2 | 99.1 | 99.5 | 99.5 | 99.6 | 99.0 | 99.0 | 99.2 | 98.3 | 98.6 | 99.1 | 98.7 | 98.7 | 99.4                        |                             |

<sup>a</sup>Order of elution and percentages are given on an apolar column (BP-1), except components with an asterisk (\*), where percentages are taken on a polar column (BP-20). (#) Thermolabile compound, percentage evaluated by a combination of GC-FID and <sup>13</sup>C-NMR data. RI, RI<sub>p</sub>: retention indices measured on apolar and polar capillary column, respectively. (-): not detected; tr: traces level (<0.05%). <sup>13</sup>C-NMR: compounds identified by NMR in the essential oil samples and obvious in at least one fraction of chromatography; <sup>13</sup>C-NMR (*italic*): compounds identified by NMR in fractions of chromatography.

**Table S2.** Plant material and essential oil extraction data.

| Samples | Leaves weight<br>(g) | Essential oil weight<br>(mg) | Extraction yield<br>(%) | Harvest site | Month         | Season |
|---------|----------------------|------------------------------|-------------------------|--------------|---------------|--------|
| 1       | 101.3                | 1042.5                       | 1.03                    | Station 1    | January 2021  | Dry    |
| 2       | 90.6                 | 921.1                        | 1.02                    | Station 1    | January 2021  | Dry    |
| 3       | 270.9                | 2016.2                       | 0.74                    | Station 1    | January 2021  | Dry    |
| 4       | 250.1                | 2214.8                       | 0.89                    | Station 2    | February 2021 | Dry    |
| 5       | 271.4                | 1678.7                       | 0.62                    | Station 2    | February 2021 | Dry    |
| 6       | 239.9                | 2034.9                       | 0.85                    | Station 2    | February 2021 | Dry    |
| 7       | 250.0                | 2333.3                       | 0.93                    | Station 2    | February 2021 | Dry    |
| 8       | 271.6                | 1659.8                       | 0.61                    | Station 2    | February 2021 | Dry    |
| 9       | 268.3                | 1816.0                       | 0.68                    | Station 4    | February 2021 | Dry    |
| 10      | 227.2                | 1886.6                       | 0.83                    | Station 3    | March 2021    | Dry    |
| 11      | 257.0                | 1499.1                       | 0.58                    | Station 3    | March 2021    | Dry    |
| 12      | 214.1                | 1910.5                       | 0.89                    | Station 3    | March 2021    | Dry    |
| 13      | 187.2                | 1406.1                       | 0.75                    | Station 3    | March 2021    | Dry    |
| 14      | 196.7                | 1925.7                       | 0.98                    | Station 3    | March 2021    | Dry    |
| 15      | 202.3                | 1333.7                       | 0.66                    | Station 3    | March 2021    | Dry    |
| 16      | 197.2                | 1370.0                       | 0.70                    | Station 4    | February 2021 | Dry    |
| 17      | 199.9                | 1148.2                       | 0.57                    | Station 3    | March 2021    | Dry    |
| 18      | 178.8                | 1203.9                       | 0.67                    | Station 4    | February 2021 | Dry    |
| 19      | 226.5                | 1654.1                       | 0.73                    | Station 3    | March 2021    | Dry    |
| 20      | 219.0                | 1875.1                       | 0.86                    | Station 4    | February 2021 | Dry    |
| 21      | 228.0                | 1550.2                       | 0.68                    | Station 5    | March 2021    | Dry    |
| 22      | 214.5                | 1634.5                       | 0.76                    | Station 5    | March 2021    | Dry    |
| 23      | 224.2                | 1324.6                       | 0.59                    | Station 5    | March 2021    | Dry    |
| 24      | 206.9                | 1790.5                       | 0.87                    | Station 5    | March 2021    | Dry    |
| 25      | 214.8                | 1575.6                       | 0.73                    | Station 5    | March 2021    | Dry    |
| 26      | 248.00               | 2344.1                       | 0.95                    | Station 6    | March 2021    | Dry    |
| 27      | 259.60               | 2019.8                       | 0.78                    | Station 6    | March 2021    | Dry    |
| 28      | 221.20               | 1891.7                       | 0.86                    | Station 6    | March 2021    | Dry    |
| 29      | 195.10               | 1933.4                       | 0.99                    | Station 6    | March 2021    | Dry    |
| 30      | 212.90               | 1913.1                       | 0.90                    | Station 1    | January 2021  | Dry    |

Harvest sites locations: Bossématié forest, Region of Abengourou, Eastern Ivory Coast, Station 1 (6°29'26.0" N and 3°29'11.7" W). Haut-Sassandra forest, Western Ivory Coast, Station 2 (6°53'40.2" N and 6°55'36.3" W), Station 3 (6°57'08.5" N and 6°59'00.5" W), Station 4 (6°54'52.7" N and 6°57'21.1" W). Yapo-Abbé forest, Southern Ivory Coast, Station 5 (5°41'08.0" N and 4°06'31.7" W) and Station 6 (5°41'48.7" N and 4°05'31.0" W).
